# Supplementary material
Source: publisher figshare collection journal article supplement (https://frontiersin.figshare.com/ndownloader/files/12673727)

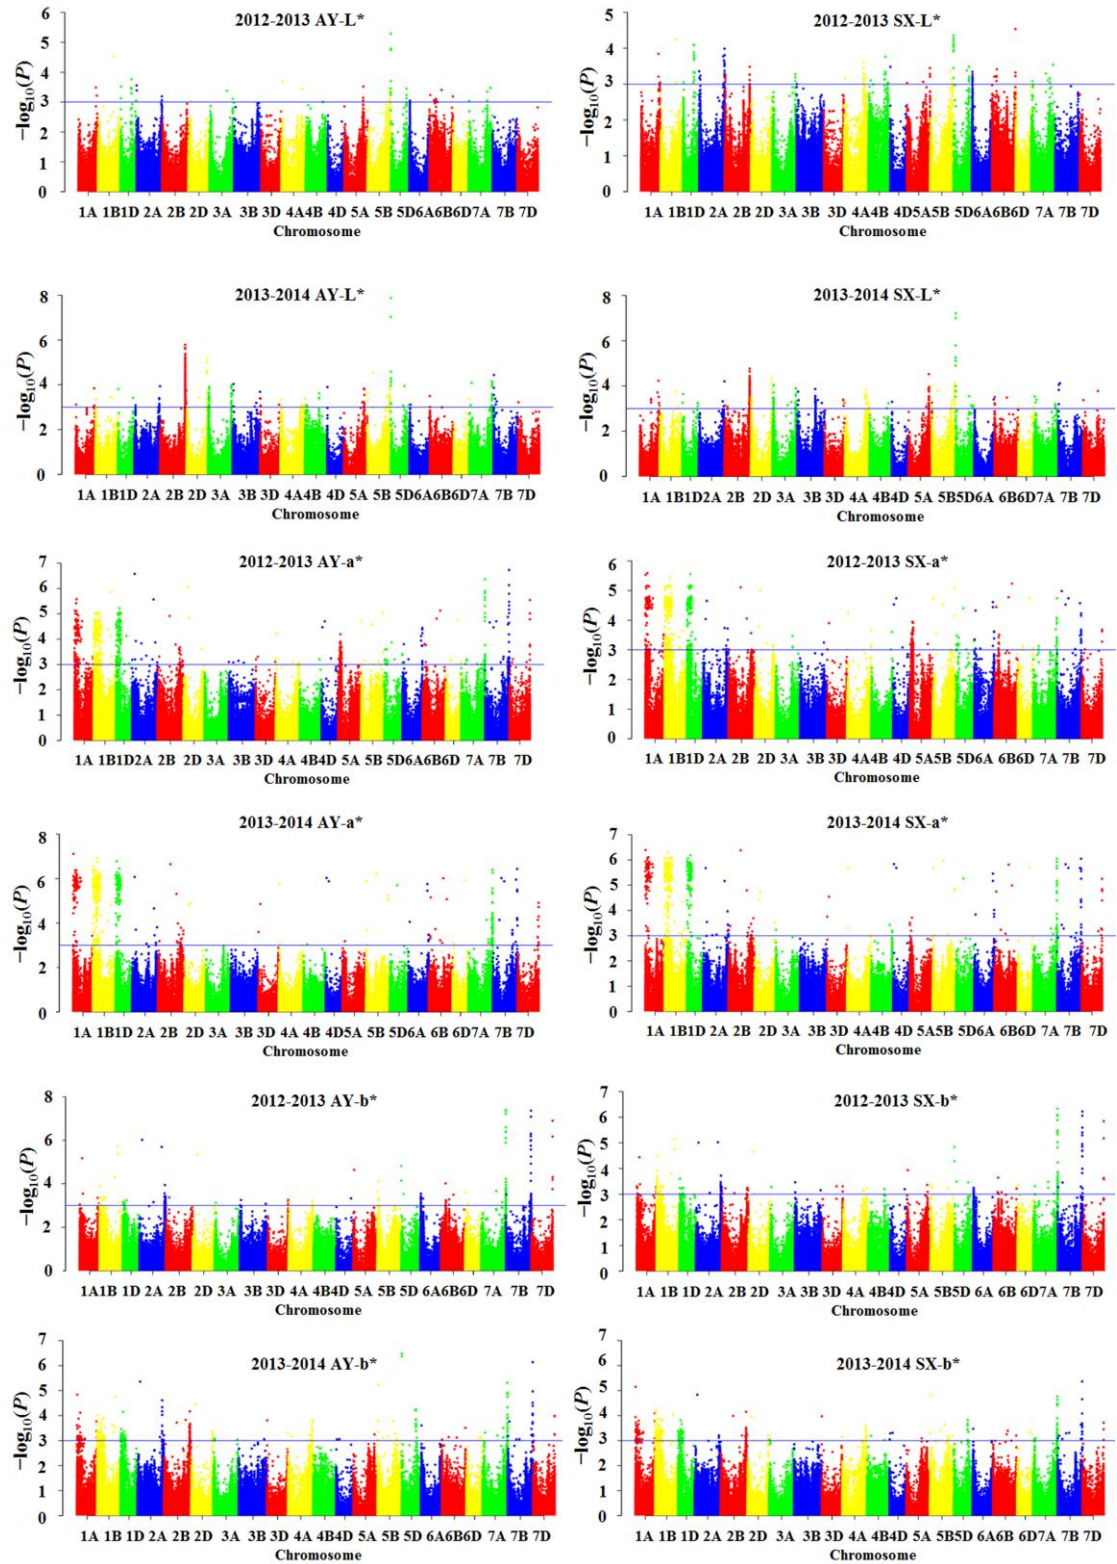

**Figure S3** Manhattan plots indicating genomic regions associated with flour color-related traits in each environment. Negative log<sub>10</sub>-transformed  $P$  values from a genome-wide scan are plotted against SNP marker position on each wheat chromosome. The blue horizontal line designates the significant association threshold ( $-\log_{10}(P) \geq 3$ ). AY, Anyang, SX, Suixi.

Continued

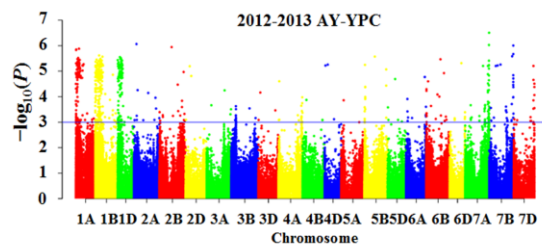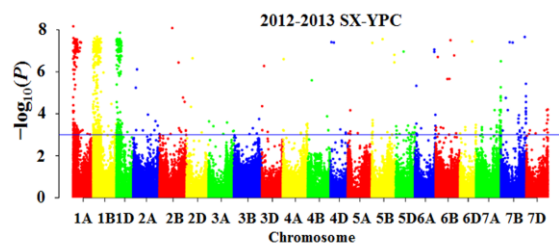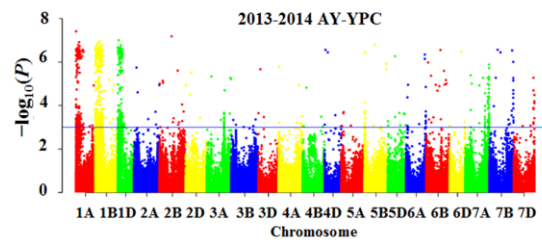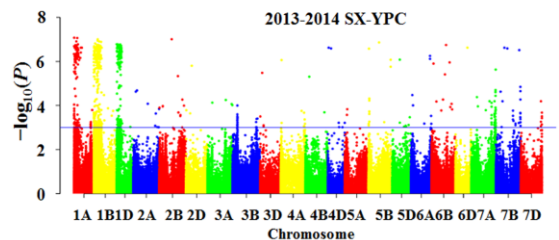

Supplement: Supplementary file [file 12673727]
